# Supplementary material for: Clinical Evaluation of 16-Week Supplementation with 5HMO-Mix in Healthy-Term Human Infants to Determine Tolerability, Safety, and Effect on Growth
Source: MDPI journal article supplement (doi:10.3390/nu13082871), 2021-08-20
Supplement: s1 [file s1]

## Supplementary

**Table S1.** Inclusion and exclusion criteria.

### Inclusion Criteria

1. Healthy male or female
2. Singleton birth
3. Full-term infant ( $\geq 37$  and  $< 42$  weeks of gestational age)
4. APGAR (Appearance, Pulse, Grimace, Activity and Respiration) score of 9 or 10, at the latest assessment within first 15 min after birth
5. Birth weight 2500–4500 g
6. 1–13 days old at V1 (1 = day of birth)
7. BM group only: parent(s)/legal representative(s') readiness to solely feed the subject with mother's breast milk during the study
8. Formula groups only: parent(s)/legal representative(s') readiness to solely feed the subject using the assigned IP during the study (at least until V6), following the unequivocal decision for the mother prior to the study not to breast-feed the infant
9. Parent(s)/legal representative(s') readiness not to administer vitamin or mineral supplements (with the exception of those recommended by a medical care provider), solid foods or any other source of calories to the subject during the study period from V1 to V6
10. Parent(s)/legal representative(s') readiness and ability to:
  - a. fill in the diary
  - b. attend scheduled visits
  - c. comply with the protocol requirements
11. Participation was based upon written informed consent by the parent(s)/legal representative(s) of the subject, following written and oral information by the investigator regarding nature, purpose, consequences and possible risks of the clinical study.

### Exclusion Criteria

1. History and/or presence of a clinically significant condition/ disorder (e.g. congenital immunodeficiency, surgery, chromosomal abnormalities etc.), which per investigator's judgement may influence the study outcome or the safety of the subject
2. Adverse maternal and/or fetal medical history that may influence:
  - a. growth/development of the subject and/or
  - b. tolerance of the IP (for the formula groups)
3. Readmission to hospital (except for hyperbilirubinemia) prior to enrolment
4. Self-reported parental and siblings' history of previously medically confirmed and clinically relevant allergy to cow's milk protein
5. Use of intravenously administered antibiotics prior to V1 by the subject.
6. Use of further concurrent treatment (including any natural health products) that may influence the study outcome (e.g. antibiotics, prebiotics, probiotics etc.) during the days prior to V1 and, unless medically indicated and recommended by a medical care provider, during the study as per investigator's judgement; vaccination is allowed
7. Subject participating in another clinical study prior to V1 and during the study

**Table S2.** Energy, nutrients and HMOs in 5HMO-Mix formula and the control IF, per 100 g formula powder and 100 ml ready-to-drink

|                  | Unit | 5HMO-Mix         |                              | IF               |                              |
|------------------|------|------------------|------------------------------|------------------|------------------------------|
|                  |      | per 100 g powder | per 100 ml<br>ready to drink | per 100 g powder | per 100 ml<br>ready to drink |
| Energy           | KJ   | 2129             | 280                          | 2163             | 283                          |
|                  | kcal | 507              | 67                           | 515              | 68                           |
| Fat              | g    | 27               | 3.6                          | 27               | 3.6                          |
| Saturated        | g    | 9.3              | 1.2                          | 9.3              | 1.2                          |
| Monounsaturated  | g    | 12.6             | 1.7                          | 12.6             | 1.7                          |
| Polyunsaturated  | g    | 5.1              | 0.7                          | 5.1              | 0.7                          |
| Carbohydrate     | g    | 53               | 7.2                          | 57               | 7.2                          |
| Lactose          | g    | 39               | 5.2                          | 39               | 5.2                          |
| Maltodextrin     | g    | 11.65            | 4.8                          | 16               | 5.4                          |
| 5HMO-Mix         | g    | 4.35             | 0.575                        | -                | -                            |
| 2'-FL            | g    | 2.26             | 0.299                        | -                | -                            |
| 3-FL             | g    | 0.57             | 0.075                        | -                | -                            |
| LNT              | g    | 1.13             | 0.150                        | -                | -                            |
| 3'-SL            | g    | 0.17             | 0.023                        | -                | -                            |
| 6'-SL            | g    | 0.22             | 0.028                        | -                | -                            |
| Protein          | g    | 11               | 1.4                          | 11               | 1.4                          |
| Salt*            | g    | 0.45             | 0.06                         | 0.45             | 0.06                         |
| Vitamins         |      |                  |                              |                  |                              |
| Vitamin A        | µg   | 476              | 62.8                         | 476              | 62.8                         |
| Vitamin D        | µg   | 9.0              | 1.2                          | 9.0              | 1.2                          |
| Vitamin E        | mg   | 12               | 1.6                          | 12               | 1.6                          |
| Vitamin K        | µg   | 60               | 7.9                          | 60               | 7.9                          |
| Vitamin C        | mg   | 86               | 11                           | 86               | 11                           |
| Vitamin B1       | mg   | 0.59             | 0.077                        | 0.59             | 0.077                        |
| Vitamin B2       | mg   | 1.5              | 0.20                         | 1.5              | 0.20                         |
| Niacin           | mg   | 3.9              | 0.51                         | 3.9              | 0.51                         |
| Vitamin B6       | mg   | 0.55             | 0.073                        | 0.55             | 0.073                        |
| Folic acid       | µg   | 169              | 22.3                         | 169              | 22.3                         |
| Vitamin B12      | µg   | 1.4              | 0.18                         | 1.4              | 0.18                         |
| Biotin           | µg   | 22               | 2.9                          | 22               | 2.9                          |
| Pantothenic acid | mg   | 5.1              | 0.67                         | 5.1              | 0.67                         |
| Minerals         |      |                  |                              |                  |                              |
| Sodium           | mg   | 180              | 23.8                         | 180              | 23.8                         |
| Potassium        | mg   | 707              | 93.4                         | 707              | 93.4                         |
| Chloride         | mg   | 339              | 44.7                         | 339              | 44.7                         |
| Calcium          | mg   | 409              | 54.0                         | 409              | 54.0                         |
| Phosphorus       | mg   | 305              | 40.3                         | 305              | 40.3                         |
| Magnesium        | mg   | 46.5             | 6.14                         | 46.5             | 6.14                         |
| Iron             | mg   | 4.4              | 0.58                         | 4.4              | 0.58                         |
| Zinc             | mg   | 3.8              | 0.50                         | 3.8              | 0.50                         |
| Copper           | mg   | 0.29             | 0.039                        | 0.29             | 0.039                        |
| Manganese        | mg   | 0.10             | 0.014                        | 0.10             | 0.014                        |
| Fluoride         | mg   | <0.070           | <0.010                       | <0.070           | <0.010                       |
| Selenium         | µg   | 14               | 1.8                          | 14               | 1.8                          |
| Iodine           | µg   | 103              | 13.5                         | 103              | 13.5                         |

**Table S3.** Complete overview of number of infants in the safety set (n = 311) with adverse events during the study period (V1–V6) categorized by MedDRA v23.1. Primary SOC. Other AEs encompass: investigations, pregnancy, puerperium and perinatal conditions, injury, poisoning and procedural complications, musculoskeletal and connective tissue disorders, eye disorders, neoplasms benign, malignant and unspecified, endocrine disorders, hepatobiliary disorders, immune system disorders, nervous system disorders, psychiatric disorders, reproductive system and breast disorders, vascular disorders, blood and lymphatic system disorders, surgical and medical procedures, renal and urinary disorders

|                                                      | 5HMO-Mix | IF | BM | 5HMO-Mix<br>vs IF | 5HMO-Mix<br>vs BM | IF vs BM |
|------------------------------------------------------|----------|----|----|-------------------|-------------------|----------|
|                                                      | n        | n  | n  | p-value           | p-value           | p-value  |
| Gastrointestinal disorders                           | 64       | 58 | 40 | 0.3975            | 0.0008            | 0.0180   |
| Infections and infestations                          | 32       | 28 | 34 | 0.5426            | 0.8817            | 0.4486   |
| Congenital, familial and genetic disorders           | 23       | 27 | 9  | 0.6267            | 0.0072            | 0.0016   |
| Skin and subcutaneous tissue disorders               | 14       | 21 | 7  | 0.2660            | 0.1129            | 0.0074   |
| Respiratory, thoracic and mediastinal disorders      | 10       | 10 | 7  | 1.0000            | 0.4603            | 0.6140   |
| General disorders and administration site conditions | 6        | 8  | 15 | 0.7831            | 0.0635            | 0.1838   |
| Metabolism and nutrition disorders                   | 5        | 1  | 3  | 0.1187            | 0.4981            | 0.6214   |
| Investigations                                       | 4        | 1  | 4  | 0.4451            | 1.0000            | 0.6829   |
| Pregnancy, puerperium and perinatal conditions       | 4        | 6  | 5  | 0.7478            | 1.0000            | 1.0000   |
| Injury, poisoning and procedural complications       | 3        | 0  | 3  | 0.1214            | 1.0000            | 0.2464   |
| Musculoskeletal and connective tissue disorders      | 3        | 3  | 1  | 1.0000            | 0.3689            | 0.6214   |
| Eye disorders                                        | 2        | 3  | 2  | 1.0000            | 1.0000            | 1.0000   |
| Neoplasms benign, malignant and unspecified          | 2        | 1  | 2  | 0.6214            | 1.0000            | 1.0000   |
| Endocrine disorders                                  | 1        | 0  | 0  | 0.4976            | 0.4976            | NA       |
| Hepatobiliary disorders                              | 1        | 2  | 3  | 1.0000            | 0.6214            | 1.0000   |
| Immune system disorders                              | 1        | 2  | 0  | 1.0000            | 0.4976            | 0.4976   |
| Nervous system disorders                             | 1        | 1  | 0  | 1.0000            | 0.4976            | 1.0000   |
| Psychiatric disorders                                | 1        | 1  | 1  | 1.0000            | 1.0000            | 1.0000   |
| Reproductive system and breast disorders             | 1        | 2  | 0  | 1.0000            | 0.4976            | 0.4976   |
| Vascular disorders                                   | 1        | 1  | 0  | 1.0000            | 0.4976            | 1.0000   |
| Blood and lymphatic system disorders                 | 0        | 1  | 0  | 1.0000            | NA                | 1.0000   |
| Surgical and medical procedures                      | 0        | 1  | 0  | 1.0000            | NA                | 1.0000   |
| Renal and urinary disorders                          | 0        | 0  | 1  | NA                | 1.0000            | 1.0000   |

n=number of subjects,

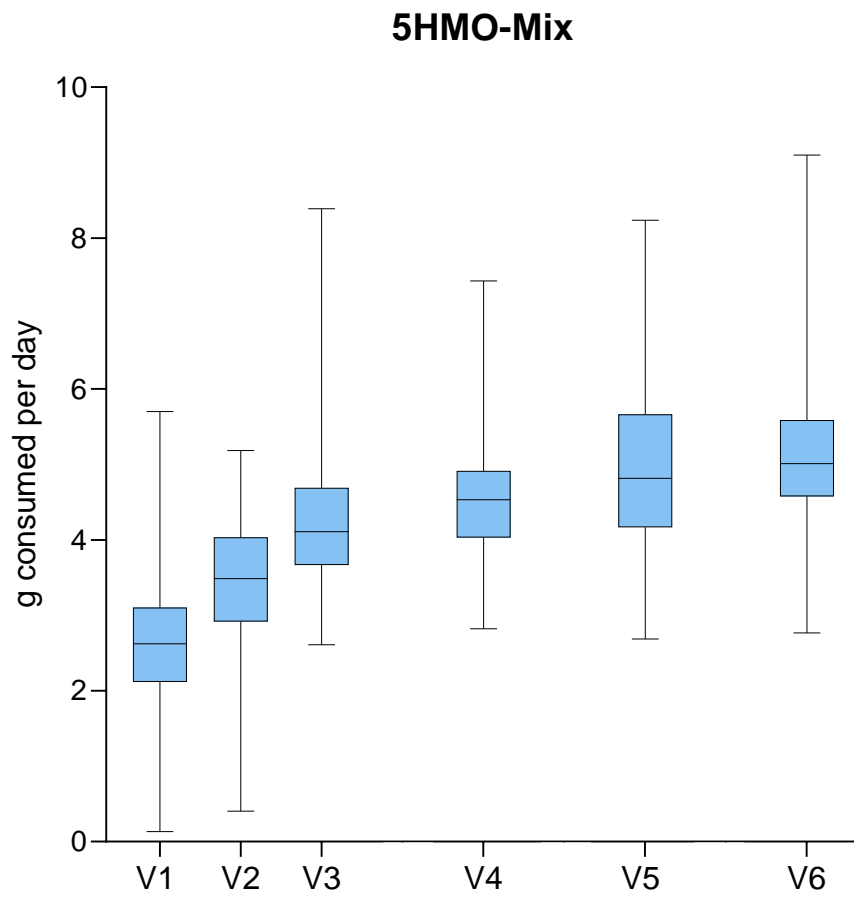

Figure S1. Average intake of the 5HMO-Mix at the different timepoints. Values presented as median, Q1, Q3, min and max. The intake is calculated based on reported quantity (ml) consumed as assessed in the 3-days diary before each visit.

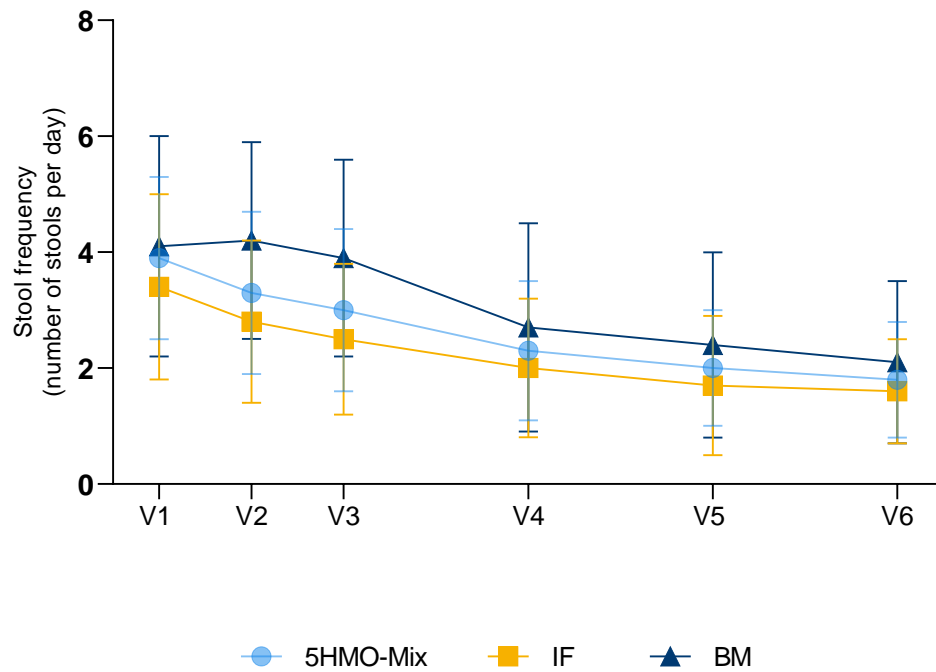

**Figure S2.** Average stool frequency per day. 5HMO-Mix = Human milk oligosaccharide (HMO) mix in infant formula, IF = infant formula, BM = breast milk. Mean number of stools per day is calculated per subject across the days available for each visit (minimum of one and maximum of three values). Only subjects with at least one stool across the days available for each visit are included in the calculation of descriptive statistics per visit.

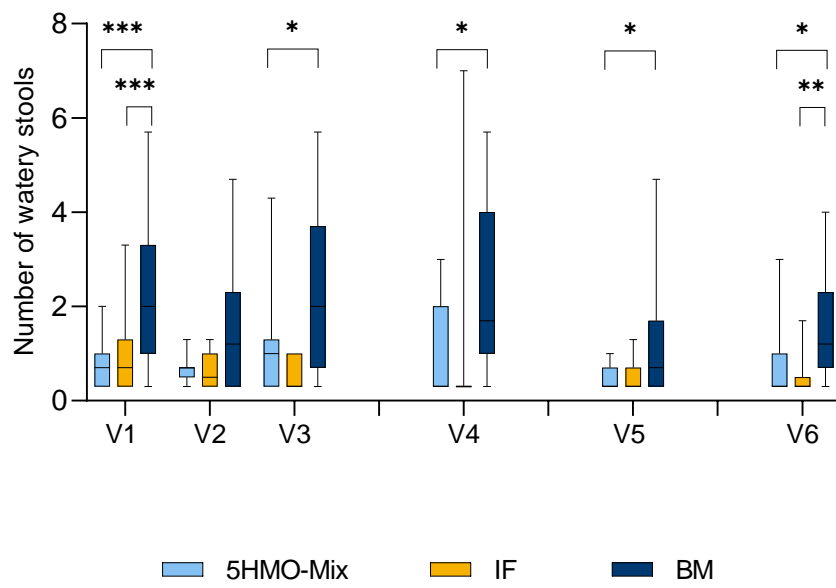

(a)

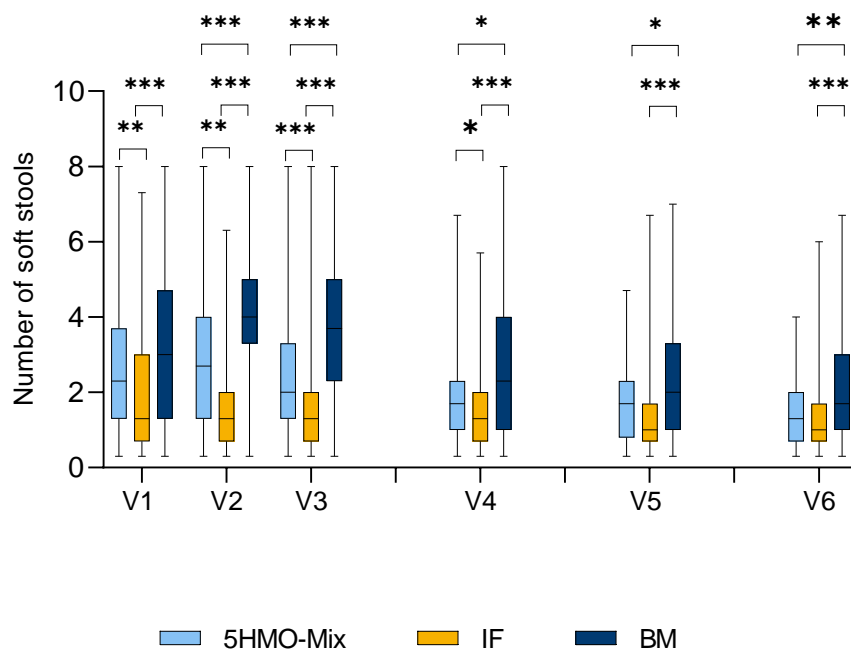

(b)

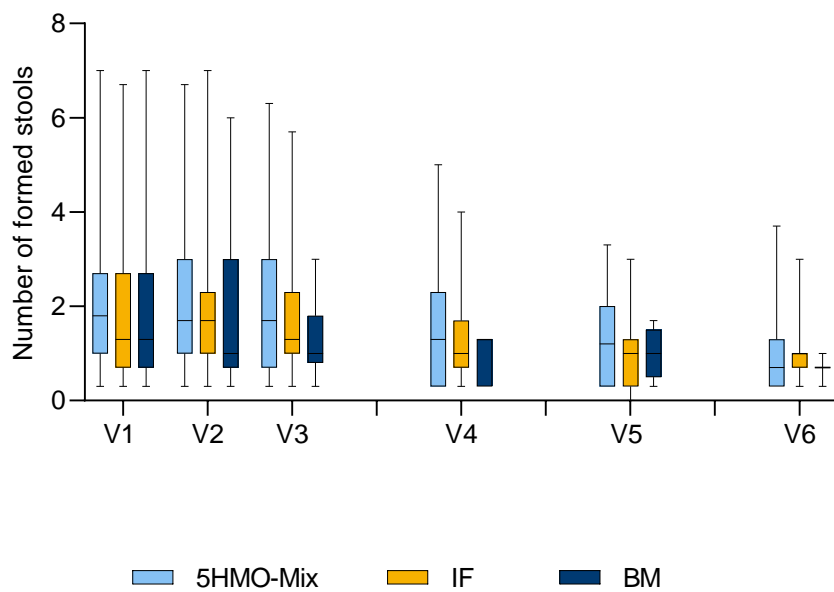

(c)

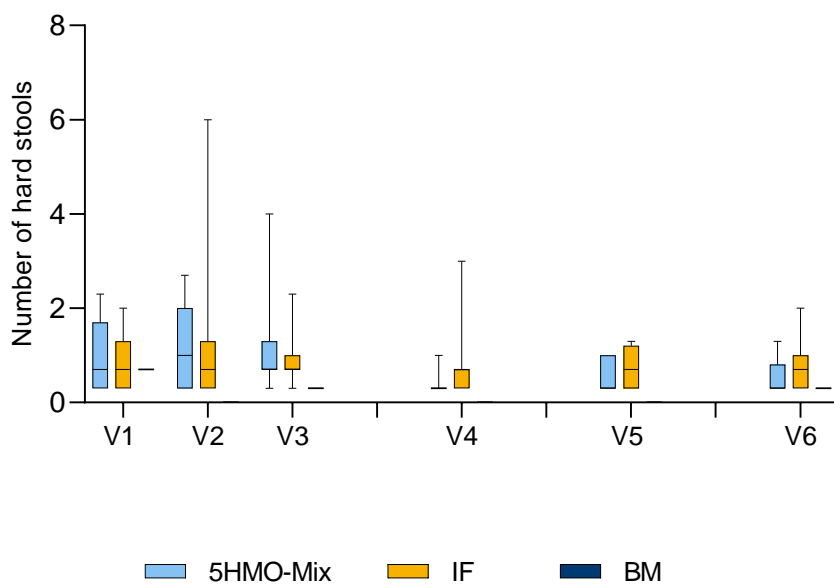

(d)

**Figure S3** Stool consistency. Mean total numbers of stools of different consistencies in all three study groups from V1 to V6. (a) Watery stools, (b) Soft stools, (c) Formed stools, and (d) Hard stool. No significant differences observed between groups for formed and hard stools. Mann-Whitney U tests with exploratory p values were calculated to \*  $p < 0.05$ , \*\*  $p < 0.01$ , \*\*\*  $p < 0.001$ .

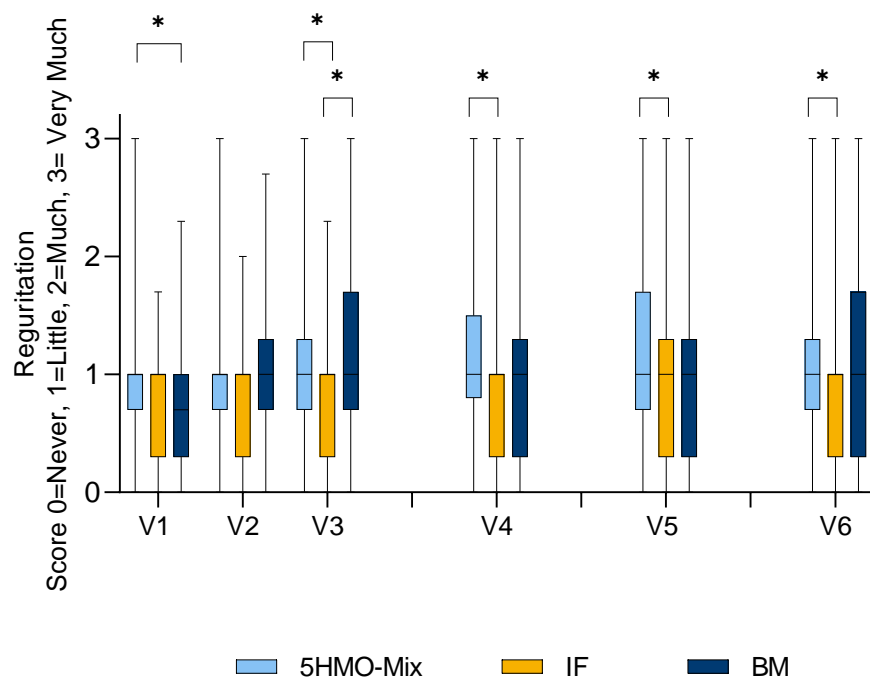

(a)

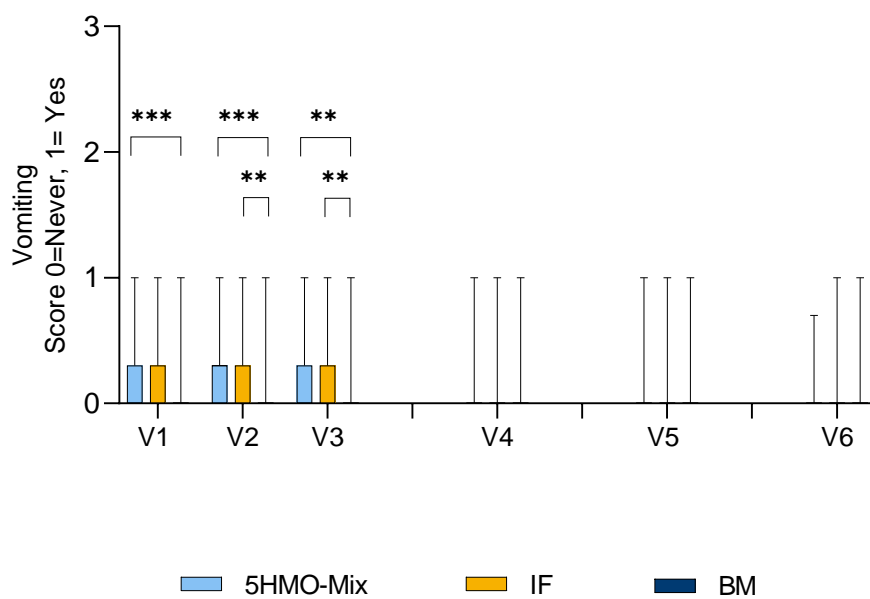

(b)

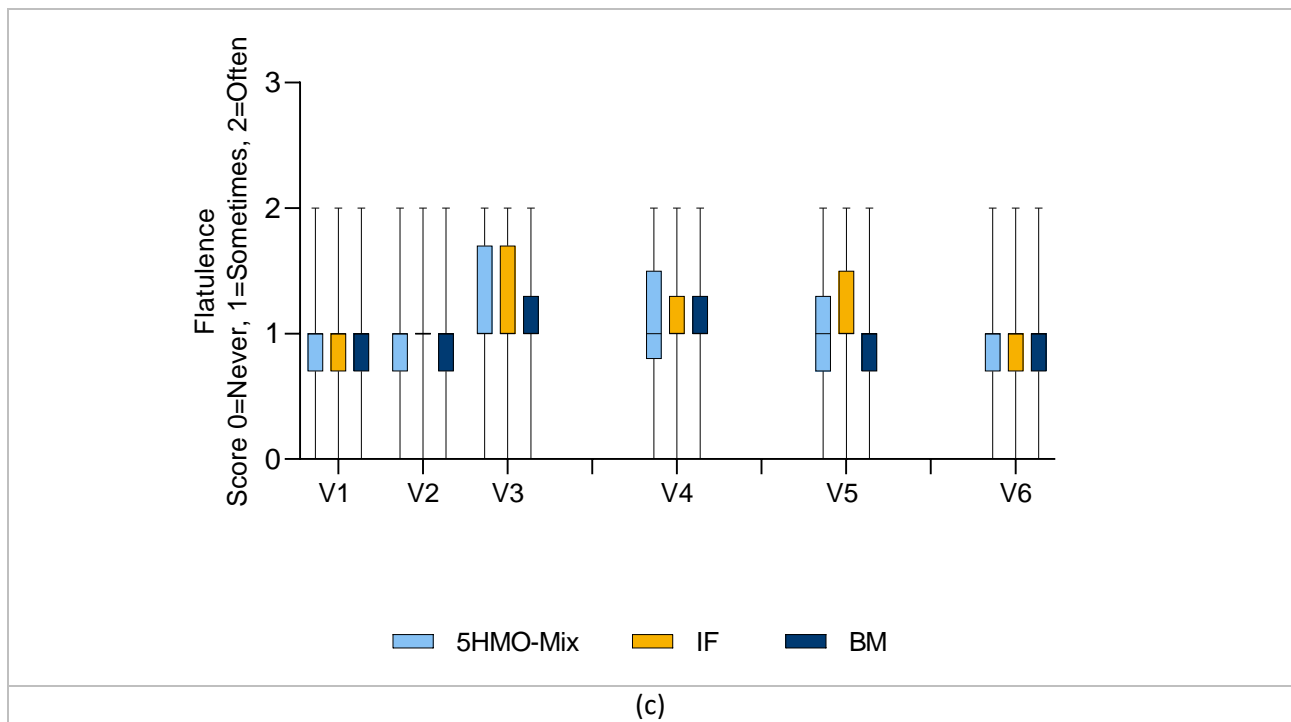

**Figure S4** Score values. Score values for (a) regurgitation (V1–V6). The mean assigned score values for regurgitation are calculated per subject across the days available for each visit (minimum of one and maximum of three values, score values 0=Never, 1=Little, 2=Much, 3= Very Much); (b) Score values for vomiting (V1–V6). Score values 0=Never, 1=Yes; and score values for (c) flatulence (V1–V6), score values 0=Never, 1=Sometimes, 2=Often. Mann-Whitney U tests with exploratory p values were calculated to \*  $p < 0.05$ , \*\*  $p < 0.01$ , \*\*\*  $p < 0.001$ .

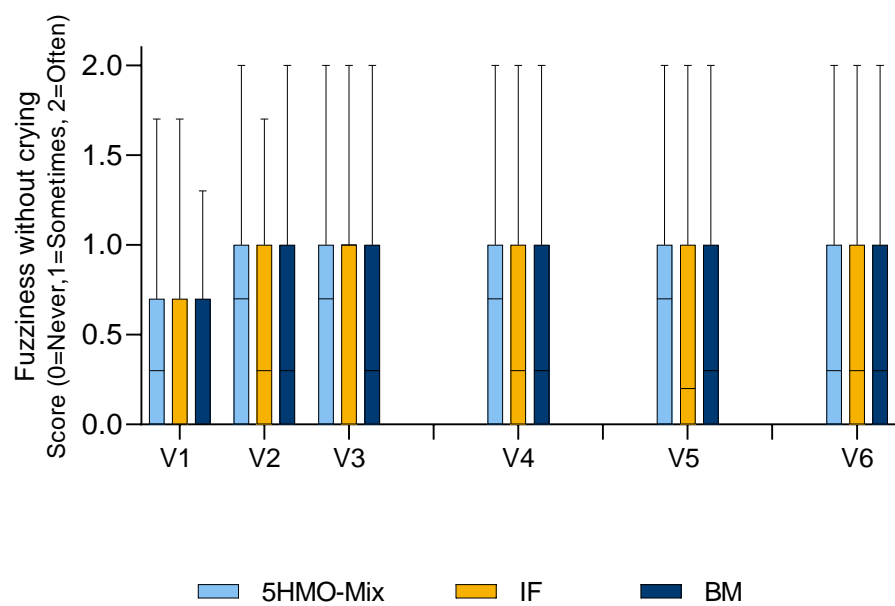

(a)

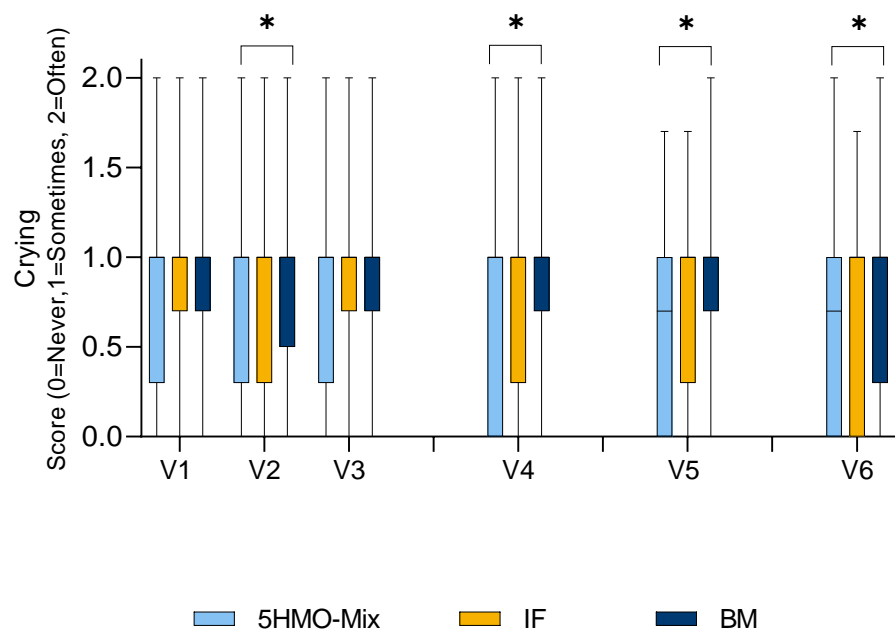

(b)

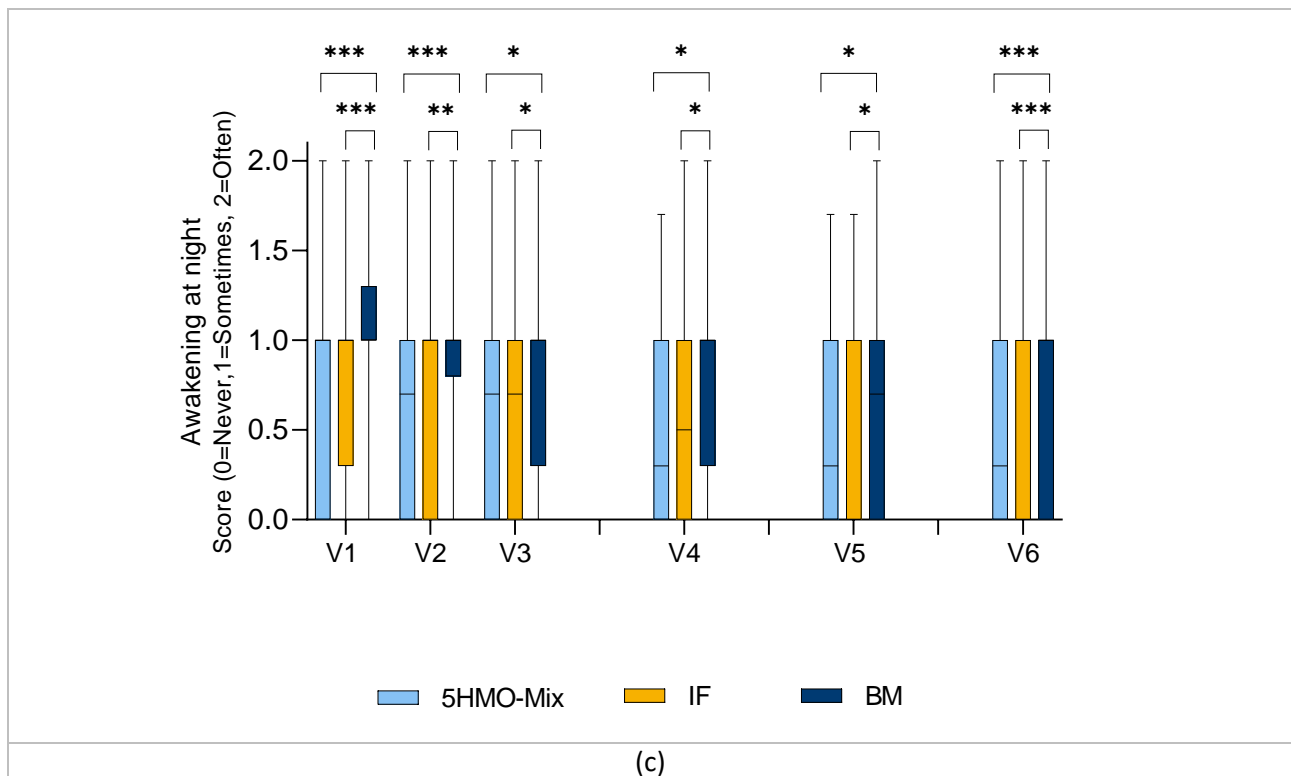

**Figure S5.** Score values for behavioral parameters from V1 to V6 from Safety dataset N= 311. (a) Score for fuzziness without crying, (b) Score value for crying, (c) score for awakening at night (V1–V6) in all study groups. Score values 0 =Never, 1=Sometimes and 2=Often. The graphs show the comparison with all three study groups with exploratory p values from Mann-Whitney U tests \*  $p < 0.05$ , \*\*  $p < 0.01$ , \*\*\*  $p < 0.001$ .
